1 Expression of a recombinant high affinity IgG Fc receptor by engineered  
2 NK cells as a docking platform for therapeutic mAbs to target cancer  
3 cells

4  
5 Running title: NK cell expression of a novel recombinant high affinity IgG Fc receptor

6  
7 Kristin M. Snyder<sup>1</sup>, Robert Hullsiek<sup>1</sup>, Hemant K Mishra<sup>1</sup>, Daniel C. Mendez<sup>1</sup>, Yunfang Li<sup>1</sup>,  
8 Allison Rogich<sup>1</sup>, Dan S. Kaufman<sup>2</sup>, Jianming Wu<sup>1\*</sup>, Bruce Walcheck<sup>1\*</sup>

9  
10 <sup>1</sup>Department of Veterinary and Biomedical Sciences, University of Minnesota, St. Paul, MN,  
11 USA.

12 <sup>2</sup>Department of Medicine, University of California-San Diego, San Diego, CA, USA.

13  
14 \*Correspondence:  
15 Dr. Bruce Walcheck  
16 walch003@umn.edu

17  
18 Dr. Jianming Wu  
19 jmwu@umn.edu

20  
21 Key words: FcR, ADCC, NK cell, immunotherapy, antibody

22 **Abstract**

23 Anti-tumor mAbs are the most widely used and characterized cancer immunotherapy agents.  
24 Despite having a significant impact on some malignancies, most cancer patients respond poorly  
25 or develop resistance to this therapy. A known mechanism of action of these therapeutic mAbs is  
26 antibody-dependent cell-mediated cytotoxicity (ADCC), which is a primarily effector function of  
27 NK cells. CD16A on human NK cells has an exclusive role in binding to tumor-bound IgG  
28 antibodies. Though CD16A is a potent activating receptor, it is a low affinity Fc $\gamma$ R and its cell  
29 surface levels can be rapidly downregulated by a proteolytic process involving ADAM17 upon  
30 NK cell activation, which are likely to limit the efficacy of tumor-targeting therapeutic mAbs in  
31 the tumor environment. We sought to enhance NK cell binding to anti-tumor mAbs by  
32 engineering these cells with a recombinant Fc $\gamma$ R consisting of the extracellular region of CD64,  
33 the highest affinity IgG Fc receptor expressed by leukocytes, and the transmembrane and  
34 cytoplasmic regions of CD16A. This novel recombinant Fc $\gamma$ R (CD64/16A) was expressed in the  
35 human NK cell line NK92 and in induced pluripotent stem cells from which primary NK cells  
36 were derived. CD64/16A also lacked the ADAM17 cleavage region in CD16A and it was not  
37 rapidly downregulated in expression following NK cell activation during ADCC. CD64/16A on  
38 NK cells facilitated conjugation to antibody-treated tumor cells, ADCC, and cytokine  
39 production, demonstrating functional activity by its two components. Unlike NK cells expressing  
40 CD16A, CD64/16A captured soluble therapeutic mAbs and the modified NK cells mediated  
41 tumor cell killing. Hence, CD64/16A could potentially be used as a docking platform on  
42 engineered NK cells for therapeutic mAbs and IgG Fc chimeric proteins, allowing for switchable  
43 targeting elements, and a novel cancer cellular therapy.  
44

## 45 **Introduction**

46 Natural killer (NK) cells are cytotoxic lymphocytes of the innate immune system that target  
47 stressed, infected, and neoplastic cells (1). In contrast to the diverse array of receptors involved  
48 in natural cytotoxicity, human NK cells mediate ADCC exclusively through the IgG Fc receptor  
49 CD16A (FcγRIIIA) (2-4). This is a potent activating receptor and its signal transduction involves  
50 the association of the transmembrane and cytoplasmic regions of CD16A with FcRγ and/or  
51 CD3ζ (4-9). Unlike other activating receptors expressed by NK cells, the cell surface levels of  
52 CD16A undergo a rapid downregulation upon NK cell activation during ADCC and by other  
53 stimuli (10-14). CD16A downregulation also occurs in the tumor environment of patients and  
54 contributes to NK cell dysfunction (15-19). A disintegrin and metalloproteinase-17 (ADAM17)  
55 expressed by NK cells plays a key role in cleaving CD16A in a *cis* manner at a specific location  
56 proximal to the cell membrane upon NK cell activation (13, 14, 20).

57  
58 There are two allelic variants of CD16A that have either a phenylalanine or valine residue at  
59 position 176 (position 158 if amino acid enumeration does not include the signal sequence). The  
60 CD16A-176V variant has a higher affinity for IgG (21, 22), but CD16A-176F is the dominant  
61 allele in humans (23). Clinical analyses have revealed a positive correlation between the  
62 therapeutic efficacy of tumor-targeting therapeutic mAbs and CD16A binding affinity. Patients  
63 homozygous for the CD16A valine variant (CD16A-V/V) had an improved clinical outcome  
64 after treatment with anti-tumor mAbs compared to those who were either heterozygous (CD16A-  
65 V/F) or homozygous (CD16A-F/F) for the lower affinity FcγRIIIA isoform (as reviewed in ref.  
66 4). These findings establish that increasing the binding affinity of CD16A for anti-tumor mAbs  
67 may lead to improved cancer cell killing.

68  
69 CD64 (FcγR1) binds to monomeric IgG with 2-3 orders of magnitude higher affinity than  
70 CD16A (24-26). CD64 recognizes the same IgG isotypes as CD16A and is expressed by myeloid  
71 cells, including monocytes, macrophages, and activated neutrophils, but not NK cells (24, 26).  
72 We generated the novel recombinant receptor CD64/16A that consists of the extracellular region  
73 of human CD64, for high affinity antibody binding, and the transmembrane and intracellular  
74 regions of human CD16A for optimal signal transduction. CD64/16A also lacked the membrane  
75 proximal ADAM17 cleavage site found in CD16A. In this study, we stably expressed CD64/16A  
76 in NK92 cells, a cytotoxic human NK cell line that lacks endogenous FcγRs (27), and in induced  
77 pluripotent stem cells (iPSCs) that were then differentiated into primary NK cells. We show that  
78 this novel recombinant FcγR is functional and can capture soluble monomeric IgG therapeutic  
79 mAbs that provide targeting elements for tumor cell ADCC.

## 80 **Materials and Methods**

### 81 **Antibodies.**

82 All mAbs to human hematopoietic and leukocyte phenotypic markers are described in **Table 1**.  
83 All isotype-matched negative control mAbs were purchased from BioLegend (San Diego, CA).  
84 APC-conjugated F(ab')<sub>2</sub> donkey anti-human or goat anti-mouse IgG (H+L) were purchased from  
85 Jackson ImmunoResearch Laboratories (West Grove, PA). The human IgG1 mAbs  
86 trastuzumab/Herceptin and rituximab/Rituxan, manufactured by Genentech (South San  
87 Francisco, CA), and cetuximab/Erbitux, manufactured by Bristol-Myers Squibb (Lawrence, NJ),  
88 were purchased through the University of Minnesota Boynton Pharmacy. Recombinant human  
89 L-selectin/IgG1 Fc chimera was purchased from R&D Systems (Minneapolis, MN).

90

### 91 **Generation of human CD64/16A.**

92 Total RNA was isolated from human peripheral blood leukocytes using TRIzol total RNA  
93 isolation reagent (Invitrogen, Carlsbad, CA) and cDNA was synthesized with the SuperScript  
94 preamplification system (Invitrogen). The recombinant CD64/16A is comprised of human CD64  
95 extracellular domain and CD16A transmembrane and cytoplasmic domains. PCR fragments for  
96 CD64 (885 bps) and CD16A (195 bps) were amplified from the generated cDNA. The PCR  
97 fragments were purified and mixed together with the forward primer 5'- CGG GAA TTC GGA  
98 GAC AAC ATG TGG TTC TTG ACA A-3', the reverse primer 5'- CCG GAA TTC TCA TTT  
99 GTC TTG AGG GTC CTT TCT-3' (underlined nucleotides are EcoR I sites), and Pfx50 DNA  
100 polymerase (Invitrogen) to generate the recombinant CD64/16A receptor. CD64/CD16A and  
101 CD16A cDNA (CD16A-176V variant) was inserted into the retroviral expression vector pBMN-  
102 IRES-EGFP and virus was generated for NK92 cell transduction, as previously described (14).  
103 Additionally, CD64/CD16A cDNA was inserted into the pKT2 sleeping beauty transposon  
104 vector and used along with SB100X transposase for iPSC transduction, as previously described  
105 (14). The nucleotide sequences of all constructs were confirmed by direct sequencing from both  
106 directions on an ABI 377 sequencer with ABI BigDye terminator cycle sequencing kit (Applied  
107 Biosystems, Foster City, CA).

108

### 109 **Cells.**

110 Fresh human peripheral blood leukocytes from plateletpheresis were purchased from Innovative  
111 Blood Resources (St. Paul, MN). Peripheral blood mononuclear cells were further enriched using  
112 Ficoll-Paque Plus (GE Healthcare Bio-Sciences AB, Uppsala, Sweden) and NK cells were  
113 purified by negative depletion using an EasySep human NK cell kit (StemCell Technologies,  
114 Cambridge, MA), as per the manufacturer's instructions, with >95% viability and 90-95%  
115 enrichment of CD56<sup>+</sup>CD3<sup>-</sup> lymphocytes. Viable cell counting was performed using a Countess II  
116 automated cell counter (Life Technologies Corporation, Bothell, WA). The human NK cell line  
117 NK92 and the ovarian cancer cell line SKOV-3 were obtained from ATCC (Manassas, VA) and  
118 cultured per the manufacturer's directions. The NK92 cells required IL-2 for growth (500  
119 IU/ml), which was obtained from R&D Systems and the National Cancer Institute, Biological  
120 Resources Branch, Preclinical Biologics Repository (Frederick, MD). For all assays described  
121 below, cells were used when in log growth phase.

122

123 The iPSCs UCBiPS7, derived from umbilical cord blood CD34 cells, have been previously  
124 characterized and were cultured and differentiated into hematopoietic progenitor cells as  
125 described with some modifications (14, 28-31). iPSCs culture and hematopoietic differentiation

126 was performed using TeSR-E8 medium and a STEMdiff Hematopoietic Kit (StemCell  
127 Technologies), which did not require the use of mouse embryonic fibroblast feeder cells, TrypLE  
128 adaption, spin embryoid body formation, or CD34<sup>+</sup> cell enrichment. iPSC cells during passage  
129 were dissociated with Gentle Cell Dissociation Reagent (StemCell Technologies), and iPSC  
130 aggregates  $\geq 50 \mu\text{m}$  in diameter were counted with a hemocytometer and diluted to 20 - 40  
131 aggregates/ml with TeSR-E8 medium. Each well of a 12-well plate was pre-coated with Matrigel  
132 Matrix (Corning Inc., Tewksbury, MA) and seeded with 40 - 80 aggregates in 2 ml of TeSR-E8  
133 medium. Cell aggregates were cultured for 24 hours before differentiation with the STEMdiff  
134 Hematopoietic Kit, as per the manufacturer's instructions. At day 12 of hematopoietic progenitor  
135 cell differentiation, the percentage of hematopoietic progenitor cells was determined using flow  
136 cytometric analysis with anti-CD34, anti-CD45, and anti-CD43 mAbs. NK cell differentiation  
137 was performed as previously described (32). The iPSC-derived NK cells (referred to here as iNK  
138 cells) were expanded for examination using  $\gamma$ -irradiated K562-mbIL21-41BBL feeder cells (1:2  
139 ratio) in cell expansion medium [60% DMEM, 30% Ham's F12, 10% human AB serum (Valley  
140 Biomedical, Winchester, VA), 20 $\mu\text{M}$  2-mercaptoethanol, 50  $\mu\text{M}$  ethanolamine, 20  $\mu\text{g}/\text{ml}$   
141 ascorbic Acid, 5 ng/ml sodium selenite, 10 mM HEPES, and 100-250 IU/ml IL-2 (R&D  
142 Systems)], as described previously (14, 29-31)..

143

#### 144 **Cell staining, flow cytometry and ELISA.**

145 For cell staining, nonspecific antibody binding sites were blocked and cells were stained with the  
146 indicated antibodies and examined by flow cytometry, as previously described (11, 14, 33). For  
147 controls, fluorescence minus one was used as well as appropriate isotype-matched antibodies  
148 since the cells of interest expressed FcRs. An FSC-A/SSC-A plot was used to set an electronic  
149 gate on leukocyte populations and an FSC-A/FSC-H plot was used to set an electronic gate on  
150 single cells. A Zombie viability kit was used to assess live vs. dead cells, as per the  
151 manufacturer's instructions (BioLegend).

152

153 To assess the capture of soluble trastuzumab, rituximab, cetuximab, or L-selectin/Fc chimera,  
154 transduced NK cells were incubated with 5  $\mu\text{g}/\text{ml}$  of antibody for 2 hours at 37°C in MEM- $\alpha$   
155 basal media (Thermo Fisher Scientific, Waltham, MA) supplemented with IL-2 (200 IU/ml),  
156 HEPES (10mM), and 2-mercaptoethanol (0.1 mM), washed with MEM- $\alpha$  basal media, and then  
157 stained on ice for 30 minutes with a 1:200 dilution of APC-conjugated F(ab')<sub>2</sub> donkey anti-  
158 human IgG (H+L). To detect recombinant human L-selectin/Fc binding, cells were stained with  
159 the anti-L-selectin mAb APC-conjugated Lam1-116.

160

161 To compare CD16A and CD64/16A staining levels on NK92 cells, the respective transductants  
162 were stained with a saturating concentration of unconjugated anti-CD16 (3G8) or anti-CD64  
163 (10.1) mAbs (5 $\mu\text{g}/\text{ml}$ ), washed extensively with dPBS (USB Corporation, Cleveland, OH)  
164 containing 2% goat serum and 2mM sodium azide, and then stained with APC-conjugated  
165 F(ab')<sub>2</sub> goat anti-mouse IgG (H+L). This approach was used since directly conjugated anti-CD16  
166 and anti-CD64 mAbs can vary in their levels of fluorophore labeling. ELISA was performed by a  
167 cytometric bead-based Flex Set assay to quantify human IFN $\gamma$  levels (BD Biosciences, San Jose,  
168 CA), per the manufacturer's instructions. All flow cytometric analyses were performed on a  
169 FACSCelesta instrument (BD Biosciences). Data was analyzed using FACSDIVA v8 (BD  
170 Biosciences) and FlowJo v10 (Ashland, OR).

171

172 **Cell-cell conjugation assay and ADCC.**

173 The pBMN-IRES-EGFP vector used to express CD64/16A in NK92 cells also expresses eGFP.  
174 These cells were incubated for 2 hours at 37°C in MEM- $\alpha$  basal media (Thermo Fisher  
175 Scientific, Waltham, MA) supplemented with IL-2 (200 IU/ml), HEPES (10mM), and 2-  
176 mercaptoethanol (0.1 mM). SKOV-3 cells were labeled with CellTrace Violet (Molecular  
177 Probes, Eugene, OR) per the manufacturer's instructions, incubated with 5 $\mu$ g/ml trastuzumab for  
178 30 minutes and washed with the MEM- $\alpha$  basal media. NK92 cells and SKOV-3 cells were then  
179 resuspended in the supplemented MEM- $\alpha$  basal media at 1x10<sup>6</sup> and 2x10<sup>6</sup>/ml, respectively. For a  
180 1:2 Effector:Target (E:T) ratio, 100 $\mu$ l of each cell type was mixed together, centrifuged for 1  
181 minute at 20 $\times$ g and incubated at 37°C for the indicated time points. After each time point, the  
182 cells were gently vortexed for 3 seconds and immediately fixed with 4°C 1% paraformaldehyde  
183 in dPBS. Samples were immediately analyzed by flow cytometry. The percentage of conjugated  
184 NK cells was calculated by gating on eGFP and CellTrace Violet double-positive events.

185  
186 To evaluate ADCC, a DELFIA EuTDA-based cytotoxicity assay was used according to the  
187 manufacturer's instructions (PerkinElmer, Waltham, MA). Briefly, target cells were labeled with  
188 Bis(acetoxymethyl)-2-2':6,2' terpyridine 6,6 dicarboxylate (BATDA) for 30 minutes in their  
189 culture medium, washed in culture medium, and pipetted into a 96-well non-tissue culture-  
190 treated U-bottom plates at a density of 8 $\times$ 10<sup>4</sup> cells/well. A tumor targeting mAb was added at the  
191 indicated concentrations of 5 $\mu$ g/mL and NK cells were added at the indicated E:T ratios. The  
192 plates were centrifuged at 400 $\times$ g for 1 minute and then incubated for 2 hours in a humidified 5%  
193 CO<sub>2</sub> atmosphere at 37°C. At the end of the incubation, the plates were centrifuged at 500 $\times$ g for 5  
194 minutes and supernatants were transferred to a 96 well DELFIA Yellow Plate (PerkinElmer) and  
195 combined with europium. Fluorescence was measured by time-resolved fluorometry using a  
196 BMG Labtech CLARIOstar plate reader (Cary, NC). BATDA-labeled target cells alone with or  
197 without therapeutic antibodies were cultured in parallel to assess spontaneous lysis and in the  
198 presence of 2% Triton-X to measure maximum lysis. The level of ADCC for each sample was  
199 calculated using following formula:

200  
201 Percent Specific Release = 
$$\frac{(\text{Experimental release count} - \text{Spontaneous release counts})}{(\text{Maximal release count} - \text{Spontaneous release count})} * 100$$

202  
203 For each experiment, measurements were conducted in triplicate using three replicate wells.

204  
205 **Statistical analyses.**

206 Statistical analyses were performed by use of GraphPad Prism (GraphPad Software, La Jolla,  
207 CA, USA). After assessing for approximate normal distribution, all variables were summarized  
208 as mean  $\pm$  SD. Comparison between 2 groups was done with Student's t-test, with p<0.05 taken  
209 as statistically significant.

210  
211



## 212 RESULTS

### 213 Expression and function of CD64/16A in NK92 cells.

214 We engineered a recombinant Fc $\gamma$ R that consists of the extracellular region of human CD64 and  
215 the transmembrane and cytoplasmic regions of human CD16A, referred to as CD64/16A (**Fig.**  
216 **1A**). The recombinant receptor was stably expressed in the human NK cell line NK92. These  
217 cells lack endogenous Fc $\gamma$ Rs but transduced cells expressing exogenous CD16A can mediate  
218 ADCC (14, 20, 27). As shown is **Figure 1B**, an anti-CD64 mAb stained NK92 cells expressing  
219 CD64/16A cells, but not parent NK92 cells or NK92 cells expressing CD16A. An anti-CD16  
220 mAb stained NK92 cells expressing CD16A, but not NK92 cells expressing CD64/16A or parent  
221 NK92 cells (**Fig. 1B**). CD16A undergoes ectodomain shedding by ADAM17 upon NK cell  
222 activation resulting in its rapid downregulation in expression (10-13, 33). CD16A and its isoform  
223 CD16B on neutrophils is cleaved by ADAM17 (10), and this occurs at an extracellular region  
224 proximal to the cell membrane (13, 14). The ADAM17 cleavage region of CD16A is not present  
225 in CD64 or CD64/16A (**Fig. 1A**). We found that CD16A underwent a >50% decrease in  
226 expression upon NK92 stimulation by ADCC, whereas CD64/16A demonstrated little to no  
227 downregulation (**Fig. 1C**).

228  
229 To evaluate the function of CD64/16A, we examined its ability to initiate E:T conjugation,  
230 induce ADCC, and stimulate IFN- $\gamma$  production upon NK cell engagement of antibody-bound  
231 tumor cells. Prior to the release of its granule contents, an NK cell must form a stable conjugate  
232 with a target cell. Using a two-color flow cytometric approach, we examined the conjugation of  
233 NK92-CD64/16A cells and SKOV-3 cells, an ovarian cancer cell line that expresses HER2. This  
234 assay was performed in the absence and presence of the anti-HER2 therapeutic mAb  
235 trastuzumab. The bicistronic vector containing CD64/16A also expressed eGFP and its  
236 fluorescence was used to identify the NK92 cells. SKOV-3 cells were labeled with the  
237 fluorescent dye CellTrace Violet. E:T conjugation resulted in two-color events that were  
238 enumerated by flow cytometry. The incubation of NK92-CD64/16A cells with SKOV-3 cells  
239 resulted in a very low level of conjugation after initial exposure that increased after 60 minutes  
240 of exposure (**Fig. 2A**). However, in the presence of trastuzumab, NK92-CD64/16A cell and  
241 SKOV-3 conjugation was appreciably enhanced (**Fig. 2A**). This increase in conjugation  
242 corresponded with higher levels of target cell killing. As shown in **Figure 2B**, SKOV-3 cell  
243 cytotoxicity by NK92-CD64/16A cells varied depending on the trastuzumab concentration and  
244 E:T ratio. To confirm the role of CD64/16A in the induction of target cell killing, we performed  
245 the ADCC assay in the presence and absence of the anti-CD64 mAb 10.1 (**Fig. 2C**), which  
246 blocks IgG binding (34). Cytokine production is also induced during ADCC and NK cells are  
247 major producers of IFN $\gamma$  (4, 35). NK92-CD64/16A cells exposed to SKOV-3 cells and  
248 trastuzumab produced considerably higher levels of IFN $\gamma$  than when exposed to SKOV-3 cells  
249 alone (**Fig. 2D**). Taken together, the above findings demonstrate that the CD64 component of the  
250 recombinant receptor engages tumor-bound antibody, and that the CD16A component promotes  
251 intracellular signaling leading to degranulation and cytokine production.

252  
253 CD64 is distinguished from the other Fc $\gamma$ R members by its unique third extracellular domain,  
254 which contributes to its high affinity and stable binding to soluble monomeric IgG (26). We  
255 compared the ability of NK92 cells expressing CD64/16A or the CD16A-176V higher affinity  
256 variant to capture soluble therapeutic mAbs. The NK92 cell transductants examined expressed  
257 similar levels of CD64/16A and CD16A (**Figure 3A**). NK92 cell transductants were incubated

258 with trastuzumab for 2 hours, excess antibody was washed away, stained with a fluorophore-  
259 conjugated anti-human IgG antibody, and then evaluated by flow cytometry. As shown in **Figure**  
260 **3B**, NK92-CD64/16A cells captured considerably higher levels of trastuzumab than did the  
261 NK92-CD16A cells (8.1 fold increase  $\pm$  1.3, mean  $\pm$  SD of 3 independent experiments).  
262 Moreover, the NK92-CD64/16A cells efficiently captured the tumor-targeting mAbs  
263 Erbitux/cetuximab and Rituxan/rituximab, as well as the fusion protein L-selectin/Fc (**Fig. 3C**).  
264 We then tested whether NK92-CD64/16A cells with a captured tumor-targeting mAb mediated  
265 ADCC. For this assay, equal numbers of NK92-CD64/16A and NK92-CD16A cells were  
266 incubated with the same concentration of soluble trastuzumab, washed, and exposed to SKOV-3  
267 cells. Target cell killing by NK92-CD64/16A cells with captured trastuzumab was significantly  
268 higher than NK92-CD64/16A cells alone, and was far superior to NK92-CD16A cells treated  
269 with or without trastuzumab at all E:T ratios examined (**Fig. 3D**). In contrast, SKOV-3  
270 cytotoxicity by NK92-CD16A and NK92-CD64/16A cells was not significantly different if  
271 trastuzumab was present and not washed out (**Fig. 3E**), thus demonstrating equivalent  
272 cytotoxicity by both transductants. Taken together, these findings show that NK92 cells  
273 expressing CD64/16A can stably bind soluble anti-tumor mAbs and IgG fusion proteins, and that  
274 these can serve as targeting elements to kill cancer cells.

#### 275 **Expression and function of CD64/16A in iPSC-derived NK cells.**

276 We also examined the function of CD64/16A in engineered primary NK cells. Genetically  
277 modifying peripheral blood NK cells by retroviral or lentiviral transduction at this point has been  
278 challenging (36). Embryonic stem cells and iPSCs can be differentiated into cytolytic NK cells *in*  
279 *vitro* (28-31, 37), and these cells are highly amenable to genetic engineering (14, 30, 38, 39).  
280 Undifferentiated iPSCs were transduced to express CD64/16A using a sleeping beauty  
281 transposon plasmid for nonrandom gene insertion and stable expression. iPSCs were  
282 differentiated into hematopoietic cells and then iNK cells by a two-step process (28, 29). For this  
283 study, we modified the hematopoietic differentiation method to streamline the procedure by  
284 using a commercially available media and hematopoietic differentiation kit, as described in the  
285 Materials and Methods. CD34<sup>+</sup>CD43<sup>+</sup>CD45<sup>+</sup> cells were generated, further differentiated into  
286 iNK cells, and these cells were expanded for analysis using recombinant IL-2 and aAPCs.  
287 CD56<sup>+</sup>CD3<sup>-</sup> is a hallmark phenotype of human NK cells, and these cells composed the majority  
288 of our differentiated cell population (**Fig. 4**). We also assessed the expression of a number of  
289 activating and inhibitory receptors on the iNK cells and compared this to peripheral blood NK  
290 cells. Certain receptors were expressed by similar proportions of the two NK cell populations,  
291 such as CD16A; however, the expanded iNK cells did lack expression of the inhibitory KIR  
292 receptors KIR2DL2/3, KIR2DL1, and KIR3DL1 and also certain activating receptors (NKp46  
293 and NKG2D) (**Fig. 4**). Another difference compared to peripheral blood NK cells was that the  
294 iNK cells were stained with an anti-CD64 mAb (**Fig. 4**), demonstrating the expression of  
295 CD64/16A.

296  
297  
298 To assess the function of CD64/16A in iNK cells, we compared iNK cells derived from iPSCs  
299 transduced with either an pKT2 empty vector or pKT2-CD64/16A. The NK cell markers  
300 mentioned above were expressed at similar levels and proportions by two iNK cell populations  
301 (data not shown), including CD16A (**Fig. 5A**), but only iNK-CD64/16A cells were stained by an  
302 anti-CD64 mAb (**Fig. 5A**). Both iNK transductants demonstrated increased SKOV-3 cell killing  
303 when in the presence of trastuzumab, yet iNK-CD64/16A cells mediated significantly higher



304 levels of ADCC than did the iNK-pKT2 control cells (**Fig. 5B**). The anti-CD16 function  
305 blocking mAb 3G8, but not the anti-CD64 mAb 10.1, effectively inhibited ADCC by the iNK-  
306 pKT2 cells (**Fig. 5B**). Conversely, 10.1, but not 3G8, blocked ADCC by the iNK-CD64/16A  
307 cells (**Fig. 5B**). These findings show that the iNK cells were cytolytic effectors responsive to  
308 CD16A and CD64/16A engagement of antibody-bound tumor cells. We also treated iNK-  
309 CD64/16A and iNK-pKT2 cells with soluble trastuzumab, washed away excess antibody, and  
310 exposed them to SKOV-3 cells. Under these conditions, ADCC by the iNK-CD64/16A cells was  
311 strikingly higher than the iNK-pKT2 cells (**Fig. 5C**), further establishing that CD64/16A can  
312 capture soluble anti-tumor mAbs that serve as a targeting element for tumor cell killing.  
313

314 **DISCUSSION**

315 CD16A has an exclusive role in inducing ADCC by human NK cells (2-4). The affinity of  
316 antibody binding and the expression levels of this IgG Fc receptor modulate NK cell effector  
317 functions and affect the efficacy of tumor-targeting therapeutic mAbs (4, 11, 19, 20). To enhance  
318 anti-tumor antibody binding by NK cells, we expressed a novel recombinant FcγR consisting of  
319 the extracellular region of the high affinity FcγR CD64 and the transmembrane and intracellular  
320 regions of CD16A. NK cells expressing CD64/16A facilitated cell conjugation with antibody-  
321 bound tumor cells, cytotoxicity, and IFNγ production, demonstrating function by both  
322 components of the recombinant FcγR. CD64/16A lacks the ADAM17 cleavage region found in  
323 CD16A and it did not undergo the same level of downregulation in expression during ADCC.  
324 Consistent with the ability of CD64 to stably bind soluble monomeric IgG, NK cells expressing  
325 CD64/16A could capture soluble anti-tumor therapeutic mAbs and kill target cells.

326  
327 CD64/16A was shown to be functional in two NK cell platforms, the NK92 cell line and primary  
328 NK cells derived from iPSCs. NK92 cells lack inhibitory KIR receptors and show high levels of  
329 natural cytotoxicity compared to other NK cell lines derived from patients (40). NK92 cells have  
330 been broadly used to express modified genes to direct their cytolytic effector function, have been  
331 evaluated in preclinical studies, and are undergoing clinical testing in cancer patients (40, 41).  
332 iPSCs are also very amendable to genetic engineering and can be differentiated into NK cells  
333 expressing various receptors to direct their effector functions (14, 30, 38, 39). The iNK cells  
334 generated in this study lacked several inhibitory and activating receptors indicating an immature  
335 state. In previous studies we have generated iNK cells with a phenotype indicative of a more  
336 mature cellular stage (29-31), which may be the result of different culture conditions. A key  
337 change for the current study was the use of a hematopoietic differentiation kit to simplify the  
338 differentiation procedure. The phenotype of the iNK cells will be important for the desired  
339 effector functions. It could be beneficial if therapeutic iNK cells administered to cancer patients  
340 lacked inhibitory receptors and certain activating receptors in order to direct and optimize their  
341 tumor cell killing by engineered receptors. The iNK cells did express endogenous CD16A and  
342 mediated ADCC, thus they were cytotoxic effector cells. We found that for pKT2 vector control  
343 iNK cells, ADCC was blocked by an anti-CD16 mAb. Interestingly, ADCC by the iNK-  
344 CD64/16A cells was blocked by an anti-CD64 mAb but not by an anti-CD16 mAb. Why  
345 endogenous CD16A in the iNK-CD64/16A cells did not have a role in the *in vitro* ADCC assay  
346 is unclear at this time. This may be due to a competitive advantage by CD64/16A in binding  
347 antibody and/or in utilizing the same pool of downstream signaling factors.

348  
349 An individual NK cell can kill multiple tumor cells in different manners. This includes by a  
350 process of sequential contacts and degranulations, referred to as serial killing (42, 43), and by the  
351 localized dispersion of its granule contents that kills surrounding tumor cells, referred to as  
352 bystander killing (44). Further studies are required to determine the effects of CD64/16A  
353 expression on these killing processes during ADCC. Inhibiting CD16A shedding has been  
354 reported to slow NK cell detachment from target cells and reduce serial killing by NK cells *in*  
355 *vitro* (45). Due to the CD64 component and its lack of ectodomain shedding, NK cells  
356 expressing CD64/16A could be less efficient at serial killing and more efficient at bystander  
357 killing. An important next step will be to assess the anti-tumor activity of NK cells expressing  
358 CD64/16A *in vivo*, and the studies will include the use of NK92-CD64/16A cells and iNK-  
359 CD64/16A cells in tumor xenograft models.

360

361 Therapeutic mAbs have become one of the fastest growing classes of drugs, and tumor-targeting  
362 mAbs are the most widely used and characterized immunotherapy for hematologic and solid  
363 tumors (46). NK cells expressing CD64/16A have several potential advantages as a combination  
364 therapy, as their capture of anti-tumor mAbs, either individually or in combination, prior to  
365 adoptive transfer provides diverse options for switchable targeting elements. Modifying NK cells  
366 expressing CD64/16A with an antibody would also reduce the dosage of therapeutic antibodies  
367 administered to patients. We showed that fusion proteins containing a human IgG Fc region,  
368 such as L-selectin/Fc, can also be captured by CD64/16A and this may provide further options  
369 for directing the tissue and tumor antigen targeting of engineered NK cells. Advantages of the  
370 NK92 and iNK cell platforms for adoptive cell therapies is that they can be readily gene  
371 modified on a clonal level and expanded into clinical-scalable cell numbers to produce  
372 engineered NK cells with improved effector activities as an off-the-shelf therapeutic for cancer  
373 immunotherapy (37, 38, 40, 41, 47).

374 **Author Contributions**

375 BW and JW collected, assembled, analyzed and interpreted the data, and wrote the manuscript.  
376 KS collected, analyzed, and interpreted the data, and revised the manuscript. RH, HM, DM, YL,  
377 and AR collected, analyzed, and interpreted the data. DK analyzed the data and revised the  
378 manuscript. All authors contributed to manuscript preparation, read, and approved the submitted  
379 version.

380

381 **Conflict of Interest Statement**

382 The authors declare that the research was conducted in the absence of any commercial or  
383 financial relationships that could be construed as a potential conflict of interest.

384

385 **Funding**

386 This work was supported by grants from the NIH, award numbers R01CA203348 and  
387 R21AI125729, and the Minnesota Ovarian Cancer Alliance. KS was supported by a Howard  
388 Hughes Medical Institute and Burroughs Wellcome Fund Medical Research Fellowship. AR was  
389 supported by the Office Of The Director of the NIH, award number T35OD011118.

390

391 **References**

- 392 1. Carotta S. Targeting NK Cells for Anticancer Immunotherapy: Clinical and Preclinical  
393 Approaches. *Frontiers in immunology* (2016) 7:152. doi: 10.3389/fimmu.2016.00152. PubMed  
394 PMID: 27148271; PubMed Central PMCID: PMC4838611.
- 395 2. Alderson KL, Sondel PM. Clinical cancer therapy by NK cells via antibody-dependent  
396 cell-mediated cytotoxicity. *J Biomed Biotechnol* (2011) 2011:379123. Epub 2011/06/11. doi:  
397 10.1155/2011/379123. PubMed PMID: 21660134; PubMed Central PMCID:  
398 PMC3110303.
- 399 3. Long EO, Kim HS, Liu D, Peterson ME, Rajagopalan S. Controlling natural killer cell  
400 responses: integration of signals for activation and inhibition. *Annu Rev Immunol* (2013) 31:227-  
401 58. doi: 10.1146/annurev-immunol-020711-075005. PubMed PMID: 23516982; PubMed Central  
402 PMCID: PMC3868343.
- 403 4. Wang W, Erbe AK, Hank JA, Morris ZS, Sondel PM. NK Cell-Mediated Antibody-  
404 Dependent Cellular Cytotoxicity in Cancer Immunotherapy. *Frontiers in immunology* (2015)  
405 6:368. doi: 10.3389/fimmu.2015.00368. PubMed PMID: 26284063; PubMed Central PMCID:  
406 PMC4515552.
- 407 5. Lanier LL, Yu G, Phillips JH. Co-association of CD3 zeta with a receptor (CD16) for IgG  
408 Fc on human natural killer cells. *Nature* (1989) 342(6251):803-5. doi: 10.1038/342803a0.  
409 PubMed PMID: 2532305.
- 410 6. Anderson P, Caligiuri M, O'Brien C, Manley T, Ritz J, Schlossman SF. Fc gamma  
411 receptor type III (CD16) is included in the zeta NK receptor complex expressed by human  
412 natural killer cells. *Proc Natl Acad Sci U S A* (1990) 87(6):2274-8. PubMed PMID: 2138330;  
413 PubMed Central PMCID: PMC53669.
- 414 7. Letourneur O, Kennedy IC, Brini AT, Ortaldo JR, O'Shea JJ, Kinet JP. Characterization  
415 of the family of dimers associated with Fc receptors (Fc epsilon RI and Fc gamma RIII). *J*  
416 *Immunol* (1991) 147(8):2652-6. PubMed PMID: 1833456.
- 417 8. Hou X, Dietrich J, Geisler NO. The cytoplasmic tail of Fc gamma RIII alpha is involved  
418 in signaling by the low affinity receptor for immunoglobulin G. *J Biol Chem* (1996)  
419 271(37):22815-22. Epub 1996/09/13. PubMed PMID: 8798459.
- 420 9. Li X, Baskin JG, Mangan EK, Su K, Gibson AW, Ji C, et al. The unique cytoplasmic  
421 domain of human Fc gamma RIII alpha regulates receptor-mediated function. *J Immunol* (2012)  
422 189(9):4284-94. Epub 2012/10/02. doi: 10.4049/jimmunol.1200704. PubMed PMID: 23024279;  
423 PubMed Central PMCID: PMC3478424.
- 424 10. Wang Y, Wu J, Newton R, Bahaie NS, Long C, Walcheck B. ADAM17 cleaves CD16b  
425 (Fc gamma RIIIb) in human neutrophils. *Biochim Biophys Acta* (2013) 1833(3):680-5. Epub  
426 2012/12/12. doi: 10.1016/j.bbamcr.2012.11.027. PubMed PMID: 23228566; PubMed Central  
427 PMCID: PMC3556181.
- 428 11. Romee R, Foley B, Lenvik T, Wang Y, Zhang B, Ankarlo D, et al. NK cell CD16 surface  
429 expression and function is regulated by a disintegrin and metalloprotease-17 (ADAM17). *Blood*  
430 (2013) 121(18):3599-608. Epub 2013/03/15. doi: 10.1182/blood-2012-04-425397. PubMed  
431 PMID: 23487023; PubMed Central PMCID: PMC3643761.
- 432 12. Peruzzi G, Femnou L, Gil-Krzewska A, Borrego F, Weck J, Krzewski K, et al.  
433 Membrane-type 6 matrix metalloproteinase regulates the activation-induced downmodulation of  
434 CD16 in human primary NK cells. *J Immunol* (2013) 191(4):1883-94. Epub 2013/07/16. doi:  
435 10.4049/jimmunol.1300313. PubMed PMID: 23851692; PubMed Central PMCID:  
436 PMC3745217.



- 437 13. Lajoie L, Congy-Jolivet N, Bolzec A, Gouilleux-Gruart V, Sicard E, Sung HC, et al.  
438 ADAM17-mediated shedding of FcγRIIIa on human NK cells: identification of the  
439 cleavage site and relationship with activation. *J Immunol* (2014) 192(2):741-51. doi:  
440 10.4049/jimmunol.1301024. PubMed PMID: 24337742.
- 441 14. Jing Y, Ni Z, Wu J, Higgins L, Markowski TW, Kaufman DS, et al. Identification of an  
442 ADAM17 cleavage region in human CD16 (FcγRIII) and the engineering of a non-  
443 cleavable version of the receptor in NK cells. *PLoS One* (2015) 10(3):e0121788. doi:  
444 10.1371/journal.pone.0121788. PubMed PMID: 25816339; PubMed Central PMCID:  
445 PMC4376770.
- 446 15. Lai P, Rabinowich H, Crowley-Nowick PA, Bell MC, Mantovani G, Whiteside TL.  
447 Alterations in expression and function of signal-transducing proteins in tumor-associated T and  
448 natural killer cells in patients with ovarian carcinoma. *Clinical cancer research : an official*  
449 *journal of the American Association for Cancer Research* (1996) 2(1):161-73. Epub 1996/01/01.  
450 PubMed PMID: 9816103.
- 451 16. Veeramani S, Wang SY, Dahle C, Blackwell S, Jacobus L, Knutson T, et al. Rituximab  
452 infusion induces NK activation in lymphoma patients with the high-affinity CD16  
453 polymorphism. *Blood* (2011) 118(12):3347-9. doi: 10.1182/blood-2011-05-351411. PubMed  
454 PMID: 21768303; PubMed Central PMCID: PMC3179401.
- 455 17. Cox MC, Battella S, La Scaleia R, Pelliccia S, Di Napoli A, Porzia A, et al. Tumor-  
456 associated and immunochemotherapy-dependent long-term alterations of the peripheral blood  
457 NK cell compartment in DLBCL patients. *Oncoimmunology* (2015) 4(3):e990773. doi:  
458 10.4161/2162402X.2014.990773. PubMed PMID: 25949906; PubMed Central PMCID:  
459 PMC4404844.
- 460 18. Granzin M, Soltenborn S, Muller S, Kollet J, Berg M, Cerwenka A, et al. Fully  
461 automated expansion and activation of clinical-grade natural killer cells for adoptive  
462 immunotherapy. *Cytotherapy* (2015) 17(5):621-32. doi: 10.1016/j.jcyt.2015.03.611. PubMed  
463 PMID: 25881519.
- 464 19. Felices M, Chu S, Kodali B, Bendzick L, Ryan C, Lenvik AJ, et al. IL-15 super-agonist  
465 (ALT-803) enhances natural killer (NK) cell function against ovarian cancer. *Gynecologic*  
466 *oncology* (2017) 145(3):453-61. Epub 2017/02/27. doi: 10.1016/j.ygyno.2017.02.028. PubMed  
467 PMID: 28236454; PubMed Central PMCID: PMC5447472.
- 468 20. Mishra HK, Pore N, Michelotti EF, Walcheck B. Anti-ADAM17 monoclonal antibody  
469 MEDI3622 increases IFNγ production by human NK cells in the presence of antibody-  
470 bound tumor cells. *Cancer Immunol Immunother* (2018) 67(9):1407-16. Epub 2018/07/07. doi:  
471 10.1007/s00262-018-2193-1. PubMed PMID: 29978334; PubMed Central PMCID:  
472 PMC6126979.
- 473 21. Wu J, Edberg JC, Redecha PB, Bansal V, Guyre PM, Coleman K, et al. A novel  
474 polymorphism of FcγRIIIa (CD16) alters receptor function and predisposes to autoimmune  
475 disease. *J Clin Invest* (1997) 100(5):1059-70. Epub 1997/09/01. doi: 10.1172/JCI119616.  
476 PubMed PMID: 9276722; PubMed Central PMCID: PMC508280.
- 477 22. Koene HR, Kleijer M, Algra J, Roos D, von dem Borne AE, de Haas M. Fc γRIIIa-  
478 158V/F polymorphism influences the binding of IgG by natural killer cell Fc γRIIIa,  
479 independently of the Fc γRIIIa-48L/R/H phenotype. *Blood* (1997) 90(3):1109-14. PubMed  
480 PMID: 9242542.
- 481 23. Dong C, Ptacek TS, Redden DT, Zhang K, Brown EE, Edberg JC, et al. Fcγ  
482 receptor IIIa single-nucleotide polymorphisms and haplotypes affect human IgG binding and are

- 483 associated with lupus nephritis in African Americans. *Arthritis & rheumatology* (2014)  
484 66(5):1291-9. doi: 10.1002/art.38337. PubMed PMID: 24782186.
- 485 24. Nimmerjahn F, Ravetch JV. Fcγ receptors as regulators of immune responses.  
486 *Nature reviews Immunology* (2008) 8(1):34-47. Epub 2007/12/08. doi: 10.1038/nri2206.  
487 PubMed PMID: 18064051.
- 488 25. Bruhns P, Iannascoli B, England P, Mancardi DA, Fernandez N, Jorieux S, et al.  
489 Specificity and affinity of human Fcγ receptors and their polymorphic variants for human  
490 IgG subclasses. *Blood* (2009) 113(16):3716-25. doi: 10.1182/blood-2008-09-179754. PubMed  
491 PMID: 19018092.
- 492 26. Kiyoshi M, Caaveiro JM, Kawai T, Tashiro S, Ide T, Asaoka Y, et al. Structural basis for  
493 binding of human IgG1 to its high-affinity human receptor FcγRI. *Nat Commun* (2015)  
494 6:6866. Epub 2015/05/01. doi: 10.1038/ncomms7866. PubMed PMID: 25925696; PubMed  
495 Central PMCID: PMC4423232.
- 496 27. Binyamin L, Alpaugh RK, Hughes TL, Lutz CT, Campbell KS, Weiner LM. Blocking  
497 NK cell inhibitory self-recognition promotes antibody-dependent cellular cytotoxicity in a model  
498 of anti-lymphoma therapy. *J Immunol* (2008) 180(9):6392-401. Epub 2008/04/22. PubMed  
499 PMID: 18424763; PubMed Central PMCID: PMC2810560.
- 500 28. Ni Z, Knorr DA, Kaufman DS. Hematopoietic and nature killer cell development from  
501 human pluripotent stem cells. *Methods in molecular biology* (2013) 1029:33-41. Epub  
502 2013/06/13. doi: 10.1007/978-1-62703-478-4\_3. PubMed PMID: 23756940.
- 503 29. Knorr DA, Ni Z, Hermanson D, Hexum MK, Bendzick L, Cooper LJ, et al. Clinical-scale  
504 derivation of natural killer cells from human pluripotent stem cells for cancer therapy. *Stem Cells*  
505 *Transl Med* (2013) 2(4):274-83. Epub 2013/03/22. doi: 10.5966/sctm.2012-0084. PubMed  
506 PMID: 23515118; PubMed Central PMCID: PMC3659832.
- 507 30. Ni Z, Knorr DA, Bendzick L, Allred J, Kaufman DS. Expression of chimeric receptor  
508 CD4zeta by natural killer cells derived from human pluripotent stem cells improves in vitro  
509 activity but does not enhance suppression of HIV infection in vivo. *Stem cells* (2014)  
510 32(4):1021-31. Epub 2013/12/07. doi: 10.1002/stem.1611. PubMed PMID: 24307574; PubMed  
511 Central PMCID: PMC3960346.
- 512 31. Hermanson DL, Bendzick L, Pribyl L, McCullar V, Vogel RI, Miller JS, et al. Induced  
513 Pluripotent Stem Cell-Derived Natural Killer Cells for Treatment of Ovarian Cancer. *Stem cells*  
514 (2016) 34(1):93-101. doi: 10.1002/stem.2230. PubMed PMID: 26503833; PubMed Central  
515 PMCID: PMC4713309.
- 516 32. Woll PS, Grzywacz B, Tian X, Marcus RK, Knorr DA, Verneris MR, et al. Human  
517 embryonic stem cells differentiate into a homogeneous population of natural killer cells with  
518 potent in vivo antitumor activity. *Blood* (2009) 113(24):6094-101. Epub 2009/04/15. doi:  
519 10.1182/blood-2008-06-165225. PubMed PMID: 19365083; PubMed Central PMCID:  
520 PMC2699231.
- 521 33. Mishra HK, Pore N, Michelotti EF, Walcheck B. Anti-ADAM17 monoclonal antibody  
522 MEDI3622 increases IFNγ production by human NK cells in the presence of antibody-  
523 bound tumor cells. *Cancer Immunol Immunother* (2018). Epub 2018/07/07. doi: 10.1007/s00262-  
524 018-2193-1. PubMed PMID: 29978334.
- 525 34. Harrison PT, Allen JM. High affinity IgG binding by FcγRI (CD64) is modulated  
526 by two distinct IgSF domains and the transmembrane domain of the receptor. *Protein*  
527 *engineering* (1998) 11(3):225-32. Epub 1998/06/05. PubMed PMID: 9613847.

- 528 35. Wang R, Jaw JJ, Stutzman NC, Zou Z, Sun PD. Natural killer cell-produced IFN-gamma  
529 and TNF-alpha induce target cell cytolysis through up-regulation of ICAM-1. *J Leukoc Biol*  
530 (2012) 91(2):299-309. Epub 2011/11/03. doi: 10.1189/jlb.0611308. PubMed PMID: 22045868;  
531 PubMed Central PMCID: PMCPMC3290424.
- 532 36. Carlsten M, Childs RW. Genetic Manipulation of NK Cells for Cancer Immunotherapy:  
533 Techniques and Clinical Implications. *Frontiers in immunology* (2015) 6:266. Epub 2015/06/27.  
534 doi: 10.3389/fimmu.2015.00266. PubMed PMID: 26113846; PubMed Central PMCID:  
535 PMCPMC4462109.
- 536 37. Zeng J, Tang SY, Toh LL, Wang S. Generation of "Off-the-Shelf" Natural Killer Cells  
537 from Peripheral Blood Cell-Derived Induced Pluripotent Stem Cells. *Stem Cell Reports* (2017)  
538 9(6):1796-812. Epub 2017/11/28. doi: 10.1016/j.stemcr.2017.10.020. PubMed PMID: 29173894;  
539 PubMed Central PMCID: PMCPMC5785702.
- 540 38. Hermanson DL, Kaufman DS. Utilizing chimeric antigen receptors to direct natural killer  
541 cell activity. *Frontiers in immunology* (2015) 6:195. doi: 10.3389/fimmu.2015.00195. PubMed  
542 PMID: 25972867; PubMed Central PMCID: PMCPMC4412125.
- 543 39. Li Y, Hermanson DL, Moriarity BS, Kaufman DS. Human iPSC-Derived Natural Killer  
544 Cells Engineered with Chimeric Antigen Receptors Enhance Anti-tumor Activity. *Cell Stem Cell*  
545 (2018). doi: 10.1016/j.stem.2018.06.002.
- 546 40. Klingemann H, Boissel L, Toneguzzo F. Natural Killer Cells for Immunotherapy -  
547 Advantages of the NK-92 Cell Line over Blood NK Cells. *Frontiers in immunology* (2016) 7:91.  
548 doi: 10.3389/fimmu.2016.00091. PubMed PMID: 27014270; PubMed Central PMCID:  
549 PMCPMC4789404.
- 550 41. Zhang C, Oberoi P, Oelsner S, Waldmann A, Lindner A, Tonn T, et al. Chimeric Antigen  
551 Receptor-Engineered NK-92 Cells: An Off-the-Shelf Cellular Therapeutic for Targeted  
552 Elimination of Cancer Cells and Induction of Protective Antitumor Immunity. *Frontiers in*  
553 *immunology* (2017) 8:533. doi: 10.3389/fimmu.2017.00533. PubMed PMID: 28572802; PubMed  
554 Central PMCID: PMCPMC5435757.
- 555 42. Bhat R, Watzl C. Serial killing of tumor cells by human natural killer cells--enhancement  
556 by therapeutic antibodies. *PLoS One* (2007) 2(3):e326. doi: 10.1371/journal.pone.0000326.  
557 PubMed PMID: 17389917; PubMed Central PMCID: PMCPMC1828617.
- 558 43. Vanherberghen B, Olofsson PE, Forslund E, Sternberg-Simon M, Khorshidi MA,  
559 Pacouret S, et al. Classification of human natural killer cells based on migration behavior and  
560 cytotoxic response. *Blood* (2013) 121(8):1326-34. doi: 10.1182/blood-2012-06-439851. PubMed  
561 PMID: 23287857.
- 562 44. Hsu HT, Mace EM, Carisey AF, Viswanath DI, Christakou AE, Wiklund M, et al. NK  
563 cells converge lytic granules to promote cytotoxicity and prevent bystander killing. *J Cell Biol*  
564 (2016) 215(6):875-89. doi: 10.1083/jcb.201604136. PubMed PMID: 27903610; PubMed Central  
565 PMCID: PMCPMC5166499.
- 566 45. Srpan K, Ambrose A, Karampatzakis A, Saeed M, Cartwright ANR, Guldevall K, et al.  
567 Shedding of CD16 disassembles the NK cell immune synapse and boosts serial engagement of  
568 target cells. *J Cell Biol* (2018). Epub 2018/07/04. doi: 10.1083/jcb.201712085. PubMed PMID:  
569 29967280.
- 570 46. Battella S, Cox MC, Santoni A, Palmieri G. Natural killer (NK) cells and anti-tumor  
571 therapeutic mAb: unexplored interactions. *J Leukoc Biol* (2016) 99(1):87-96. Epub 2015/07/03.  
572 doi: 10.1189/jlb.5VMR0415-141R. PubMed PMID: 26136506.

573 47. Angelos MG, Kaufman DS. Pluripotent stem cell applications for regenerative medicine.  
574 *Curr Opin Organ Transplant* (2015) 20(6):663-70. doi: 10.1097/MOT.0000000000000244.  
575 PubMed PMID: 26536430; PubMed Central PMCID: PMC4635470.  
576

577 **Figure legends**

578 **Figure 1. Expression of CD64/16A by NK92 cells.** (A) Schematic representation of the cell  
579 membrane forms of CD16A, CD64, and CD64/16A. CD16A undergoes ectodomain shedding by  
580 ADAM17 at a membrane proximal location, as indicated, which is not present in CD64 and  
581 CD64/16A. (B) NK92 parental cells, NK92-CD16A cells, and NK92-CD64/16A cells were  
582 stained with an anti-CD16, anti-CD64, or an isotype-matched negative control mAb and  
583 examined by flow cytometry. (C) NK92-CD16A and NK92-CD64/16A cells were incubated  
584 with SKOV-3 cells with or without trastuzumab (5 $\mu$ g/ml) at 37°C (E:T = 1:1) for 2 hours. The  
585 NK92-CD16A and NK92-CD64/16A cells were then stained with an anti-CD16 mAb or an anti-  
586 CD64 mAb, respectively, and examined by flow cytometry. Nonspecific antibody labeling was  
587 determined using the appropriate isotype-negative control mAb. Data is representative of at least  
588 3 independent experiments.

589  
590 **Fig. 2. CD64/16A promotes target cell conjugation, ADCC, and IFN $\gamma$  production.** (A)  
591 NK92-CD64/16A cells expressing eGFP and SKOV-3 cells labeled CellTrace Violet were mixed  
592 at an E:T ratio of 1:2 with or without trastuzumab (5 $\mu$ g/ml), incubated at 37 °C for 60 minutes,  
593 fixed, and then analyzed by flow cytometry, as described in the Materials and Methods.  
594 Representative data from at least three independent experiments are shown. (B) NK92-  
595 CD64/16A cells were incubated with SKOV-3 cells (E:T = 20:1) and trastuzumab (tras.) at the  
596 indicated concentrations (left panel), or with SKOV-3 cells at the indicated E:T ratios in the  
597 presence or absence of trastuzumab (5 $\mu$ g/ml) (right panel) for 2 hours at 37 °C. Data are  
598 represented as % specific release and the mean  $\pm$  SD of 3 independent experiments is shown.  
599 Statistical significance is indicated as \* $p$  < 0.05, \*\* $p$  < 0.01. (C) NK92-CD64/16A cells were  
600 incubated with SKOV-3 cells (E:T = 20:1) in the presence or absence of trastuzumab (5 $\mu$ g/ml)  
601 and the anti-CD64 mAb 10.1 (10 $\mu$ g/ml), as indicated, for 2 hours at 37 °C. Data are represented  
602 as % specific release and the mean  $\pm$  SD of 3 independent experiments is shown. Statistical  
603 significance is indicated as \*\* $p$  < 0.01. (D) NK92-CD64/16A cells were incubated with SKOV-3  
604 cells (E:T = 1:1) with or without trastuzumab (5 $\mu$ g/ml) for 2 hours at 37 °C. Secreted IFN $\gamma$  levels  
605 were quantified by ELISA. Data is shown as mean of 2 independent experiments.

606  
607 **Fig. 3. CD64/16A attaches to soluble tumor-targeting mAbs and IgG fusion proteins.** (A)  
608 Relative expression levels of CD16A and CD64/16A on NK92 cells were determined by cell  
609 staining with anti-CD16 and anti-CD64 mAbs (black bars), respectively, or an isotype-matched  
610 negative control antibody (gray bars). The bar graph shows mean fluorescence intensity  
611 (MFI)  $\pm$  SD of three independent experiments. Representative flow cytometric data are shown in  
612 the histogram overlay. The dashed line histogram shows CD64 staining of NK92-CD64/16A  
613 cells, the orange-filled histogram shows CD16A staining of NK92-CD16A cells, and the green-  
614 filled histogram shows isotype control antibody staining of the NK92-CD16A cells. (B) NK92-  
615 CD16A and NK92-CD64/16A cells were incubated with or without trastuzumab (5 $\mu$ g/ml) for 2  
616 hours at 37°C, washed, stained with a fluorophore-conjugated anti-human secondary antibody,  
617 and analyzed by flow cytometry. Data is representative of at least 3 independent experiments.  
618 (C) NK92-CD64/16A cells were incubated with cetuximab or rituximab (5 $\mu$ g/ml for each),  
619 washed, and then stained with a fluorophore-conjugated anti-human secondary antibody. Control  
620 represents cells stained with the anti-human secondary antibody only. NK92-CD64/16A cells  
621 were also incubated with L-selectin/Fc (5 $\mu$ g/ml), washed, and then stained with a fluorophore-  
622 conjugated anti-L-selectin mAb. NK92 cells lack expression of endogenous L-selectin (data not



623 shown). All staining was analyzed by flow cytometry. Data shown are representative of 3  
624 independent experiments. **(D)** NK92-CD16A and NK92-CD64/16A cells were incubated in the  
625 presence or absence of trastuzumab (5 $\mu$ g/ml), washed, and exposed to SKOV-3 cells at the  
626 indicated E:T cell ratios for 2 hours at 37°C. Data is shown as mean  $\pm$  SD of 3 independent  
627 experiments. Statistical significance is indicated as \*\* $p < 0.01$ , \*\*\* $p < 0.001$ . *bd* = below  
628 detection, (i.e., < spontaneous release by negative control cells). **(E)** NK92-CD16A and NK92-  
629 CD64/16A cells were incubated with SKOV-3 cells (E:T = 10:1) in the presence or absence of  
630 trastuzumab (5 $\mu$ g/ml), as indicated, for 2 hours at 37°C. Data is shown as mean  $\pm$  SD of 3  
631 independent experiments. Statistical significance is indicated as \*\* $p < 0.01$ .

632  
633 **Fig. 4. Generation of iNK cells expressing CD64/CD16A.** iPSCs were transduced to stably  
634 express CD64/16A, differentiated into NK cells, and then expanded using K562-mbIL21-41BBL  
635 feeder cells, as described in the Materials and Methods. iNK-CD64/16A cells and freshly  
636 isolated peripheral blood (PB) NK cells enriched from adult peripheral blood were stained for  
637 CD56, CD3 and various inhibitory and activating receptors, as indicated. CD64/16A expression  
638 was determined by staining the cells with an anti-CD64 mAb. Representative data from at least  
639 three independent experiments are shown.

640  
641 **Fig 5. iNK-CD64/16A cells show enhanced ADCC compared to iNK-pKT2 control cells.** **(A)**  
642 NK cells derived from empty vector (iNK-pKT2) or CD64/16A (iNK-CD64/16A) transduced  
643 iPSCs were stained for CD56, CD64, and CD16A, as indicated. **(B)** iNK-pKT2 and iNK-  
644 CD64/16A cells were incubated with SKOV-3 cells (E:T = 10:1) in the presence or absence of  
645 trastuzumab (5 $\mu$ g/ml), the function blocking anti-CD16 mAb 3G8 (5 $\mu$ g/ml), and the function  
646 blocking anti-CD64 mAb 10.1 (5 $\mu$ g/ml), as indicated, for 2 hours at 37°C. Data is shown as  
647 mean  $\pm$  SD of 3 independent experiments. Statistical significance is indicated as \*\*\* $p < 0.001$ ;  
648 \*\*\*\* $p < 0.0001$ . **(C)** iNK-pKT2 and iNK-CD64/16A cells were incubated in the presence or  
649 absence of trastuzumab (5 $\mu$ g/ml), washed, and exposed to SKOV-3 cells (E:T = 10:1) for 2 hours  
650 at 37°C. Data is shown as mean  $\pm$  SD of 3 independent experiments. Statistical significance is  
651 indicated as \*\*\* $p < 0.001$ .

652 **Table 1. Antibodies.**

| <i>Antigen</i>     | <i>Clone</i> | <i>Fluorophore</i> | <i>Company</i>            |
|--------------------|--------------|--------------------|---------------------------|
| CD56               | HCD56        | PE-CY7             | BioLegend, San Diego, CA  |
| CD3                | HIT3a        | PE                 | BioLegend                 |
| CD16               | 3G8          | APC                | BioLegend                 |
| CD16               | 3G8          | none               | Ancell, Bayport, MN       |
| CD7                | CD7-6B7      | PE/CY5             | BioLegend                 |
| CD336/NKp44        | P44-8        | APC                | BioLegend                 |
| CD335/NKp46        | 9E2          | APC                | BioLegend                 |
| CD159a/NKG2A       | Z199         | APC                | Beckman Coulter, Brea, CA |
| CD314/NKG2D        | 1D11         | PerCP/Cy5.5        | BioLegend                 |
| CD158a/KIR2DL1     | HP-MA4       | PE                 | BioLegend                 |
| CD158b1/KIR2DL2/L3 | DX27         | PE                 | BioLegend                 |
| CD158e1/KIR3DL1    | DX9          | PE                 | BioLegend                 |
| CD94               | DX22         | PE                 | BioLegend                 |
| CD64               | 10.1         | APC                | BioLegend                 |
| CD64               | 10.1         | none               | Ancell                    |
| CD34               | 561          | PE                 | BioLegend                 |
| CD45               | 2D1          | APC                | BioLegend                 |
| CD43               | CD43-10G7    | APC                | BioLegend                 |
| CD62L/L-selectin   | LAM1-116     | APC                | Ancell                    |

653

654

Figure 1

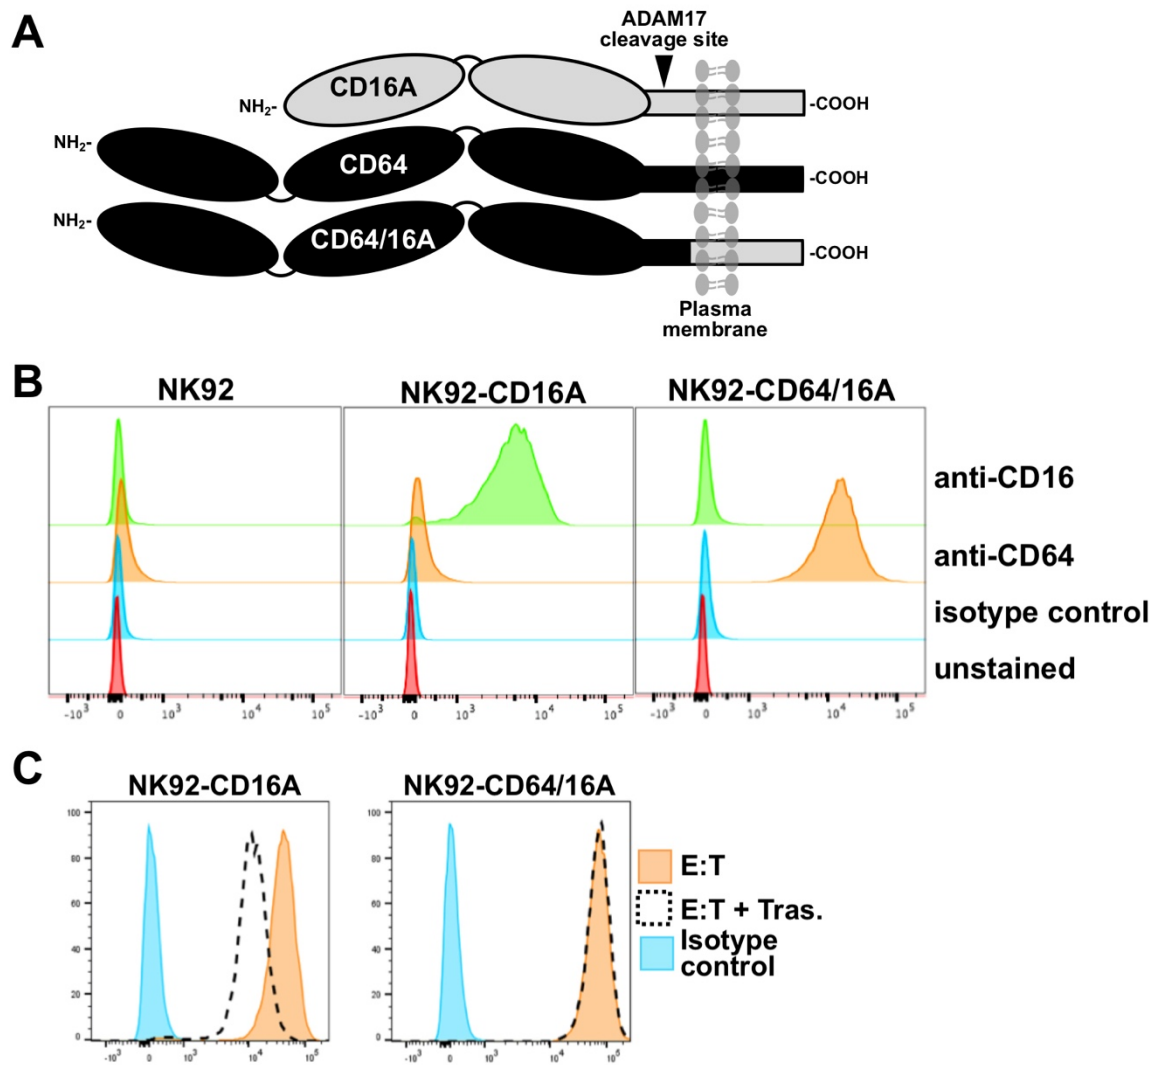

655  
656

Figure 2

**A**

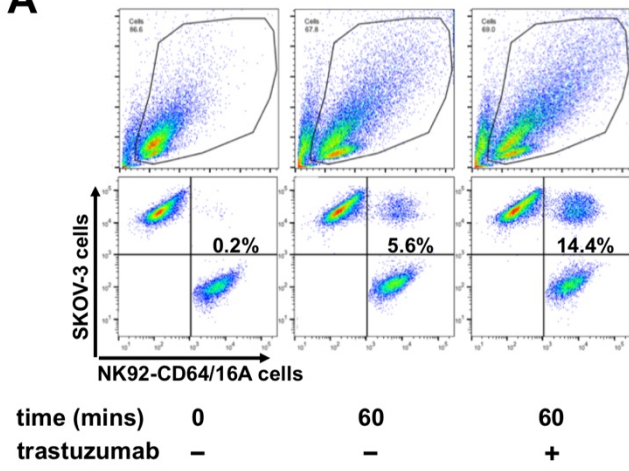

**B**

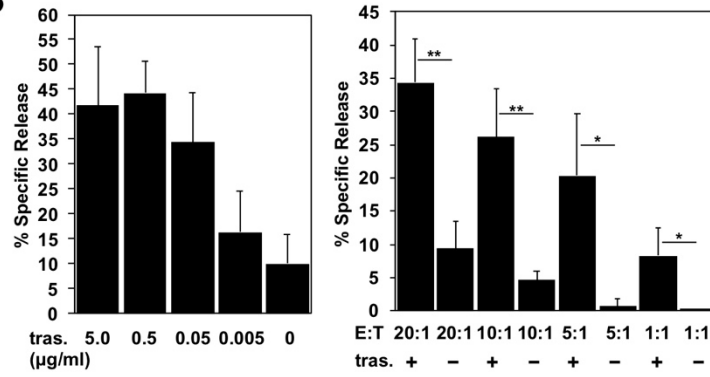

**C**

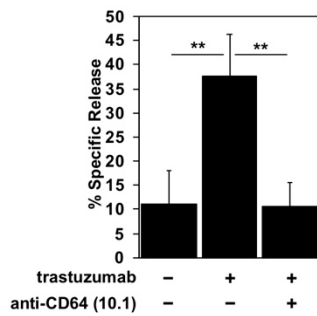

**D**

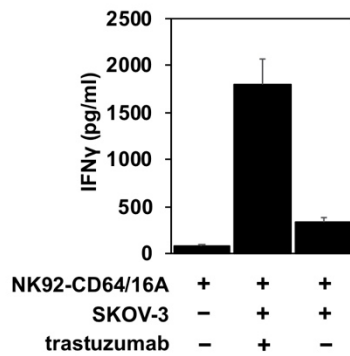

Figure 3

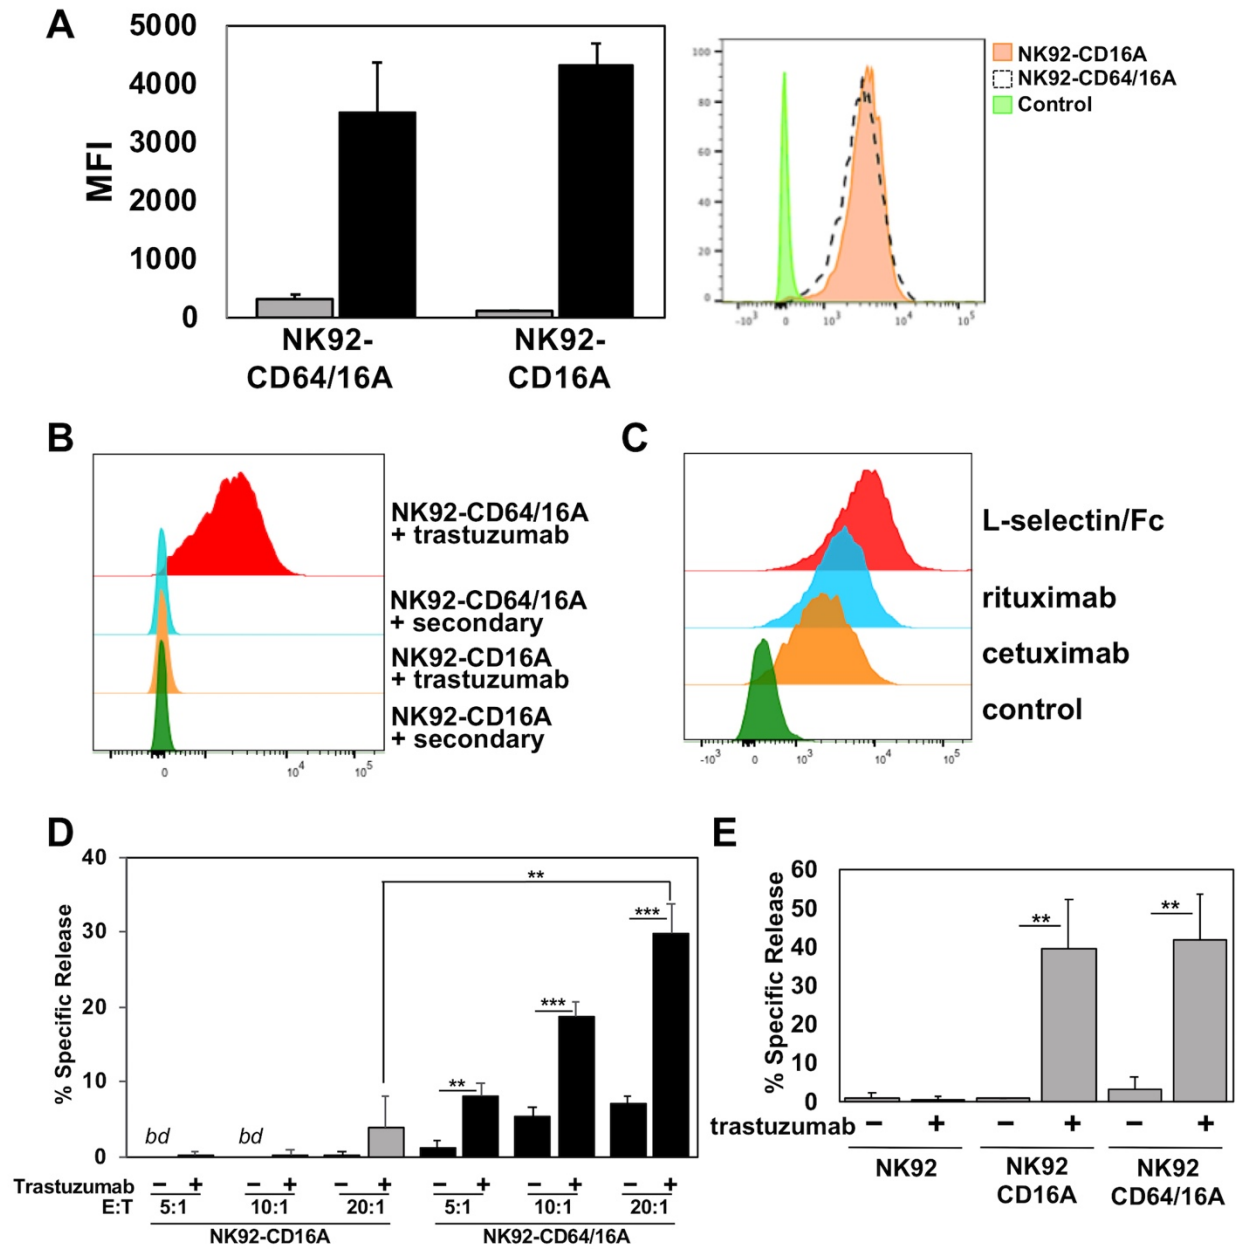

658  
659



Figure 4

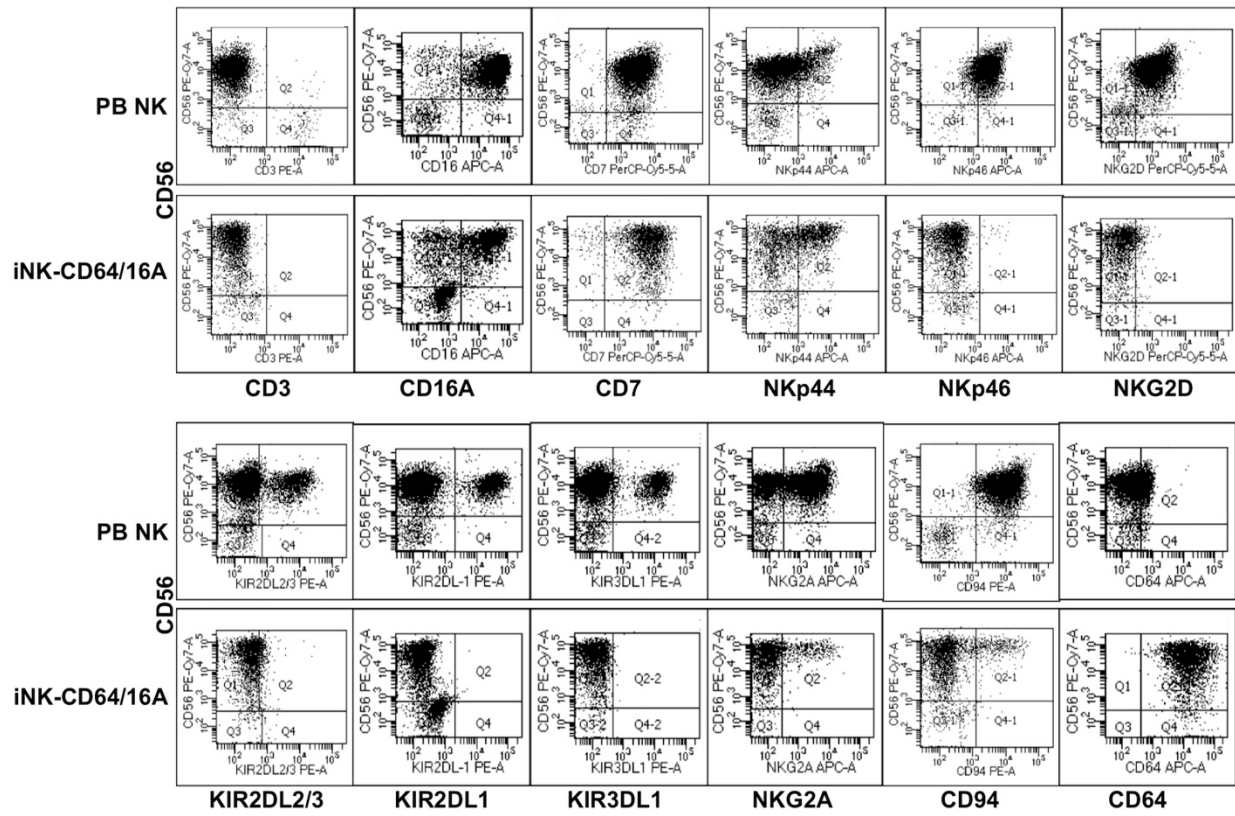

660  
661

Figure 5

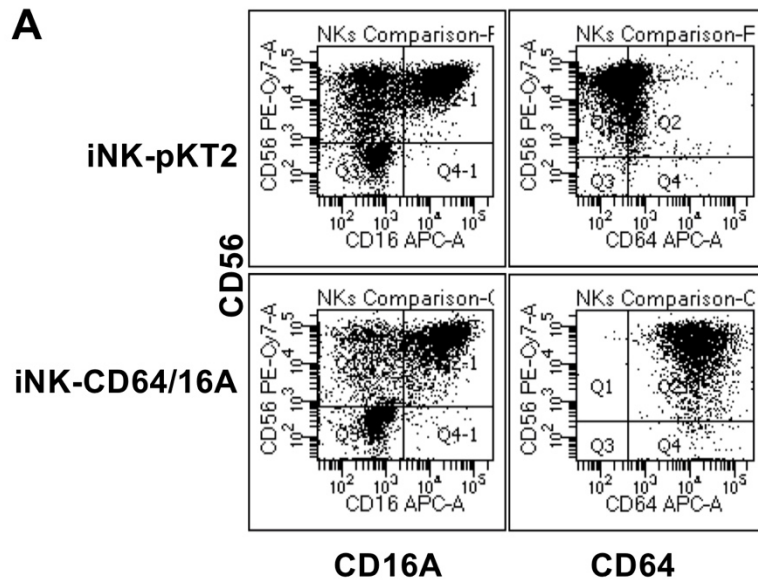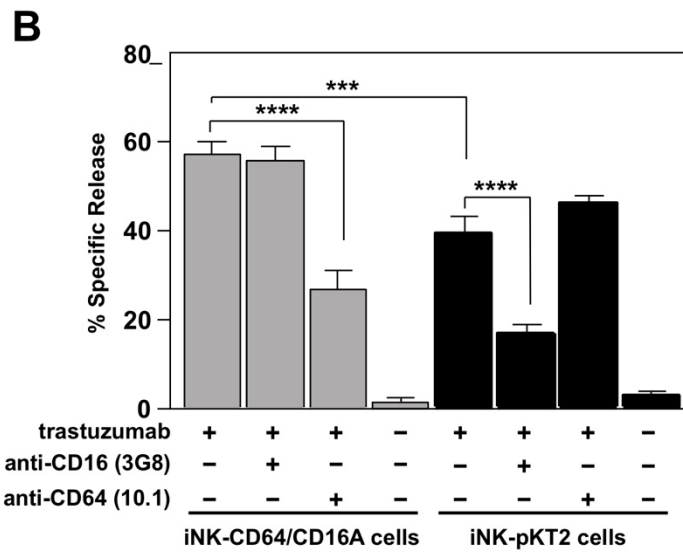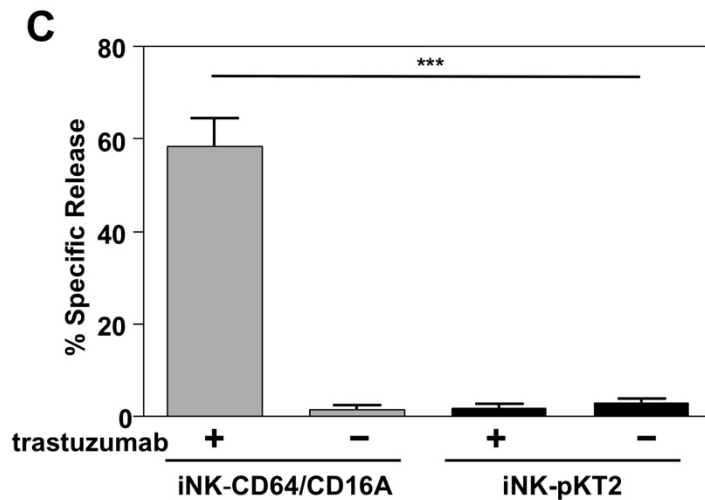

Source: http://biorxiv.org/content/10.1101/432849v1.full.pdf
